# Supplementary material for: Optimal density-functional theory method for zinc–amino acid complexes determined by analyzing structural and Fourier-transform infrared spectroscopy data
Source: Royal Society of Chemistry journal article supplement (doi:10.1039/d3ra07172c), 2024-01-01
Supplement: d3ra07172c1.pdf [file d3ra07172c1.pdf]

## Supporting Information

### **Optimal density-functional theory method for zinc–amino acid complexes determined by analyzing structural and Fourier-transform infrared spectroscopy data**

**Unghwi Yoon<sup>a,b</sup>, Jongsik Kim<sup>c</sup>, Sang Hoon Kim<sup>a,b\*</sup>, Keunhong Jeong<sup>d\*</sup>**

<sup>a</sup>Extreme Materials Research Center, Korea Institute of Science and Technology (KIST),  
Seoul 02792, South Korea.

<sup>b</sup>Division of Nano & Information Technology at KIST School, University of Science and  
Technology (UST), Daejeon 34113, South Korea.

<sup>c</sup>Department of Chemical Engineering, Kyung Hee University, Yongin 17104, South Korea

<sup>d</sup>Department of Physics & Chemistry, Korea Military Academy (KMA), Seoul 01805, South  
Korea.

Corresponding Author : S.H. Kim : kim\_sh@kist.re.kr

K. Jeong : doas1mind@kma.ac.kr

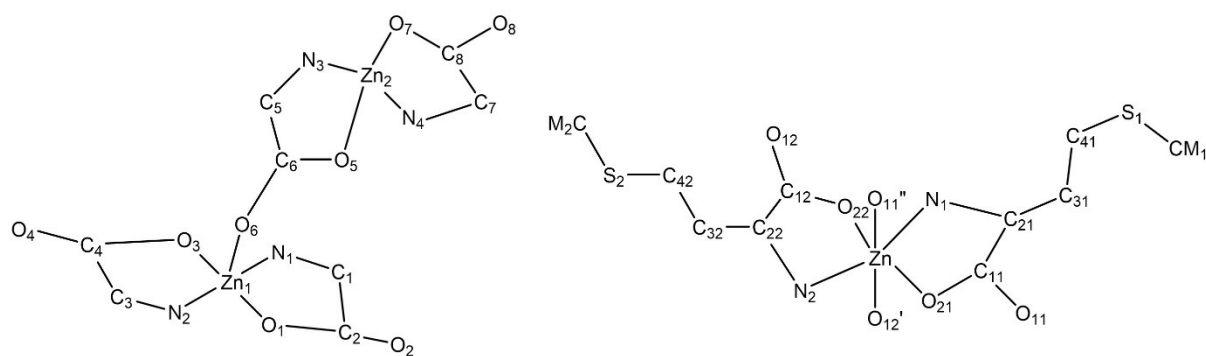

SI Fig. 1. Basic structure of Zn-Gly<sub>2</sub> and Zn-Met<sub>2</sub>

SI Table 1. Calculated bond lengths of single Zn-Gly<sub>2</sub>.

| Bond   | Bond Length(Å) |                   |       |       |       |
|--------|----------------|-------------------|-------|-------|-------|
|        | Experiment     | B3LYP/<br>LANL2DZ | B3LYP | M06   | M06-L |
| Zn1-N1 | 2.023          | 2.159             | 2.134 | 2.104 | 2.131 |
| Zn1-N2 | 2.035          | 2.159             | 2.135 | 2.103 | 2.131 |
| Zn1-O1 | 2.114          | 1.938             | 1.922 | 1.907 | 1.920 |
| Zn1-O3 | 2.174          | 1.938             | 1.922 | 1.907 | 1.920 |
| C2-O1  | 1.271          | 1.333             | 1.302 | 1.293 | 1.300 |
| C2-O2  | 1.242          | 1.248             | 1.214 | 1.208 | 1.214 |
| C1-N1  | 1.476          | 1.513             | 1.495 | 1.484 | 1.488 |
| C4-O3  | 1.252          | 1.333             | 1.302 | 1.293 | 1.300 |

|             |               |                |             |               |       |
|-------------|---------------|----------------|-------------|---------------|-------|
| C4–O4       | 1.265         | 1.248          | 1.214       | 1.208         | 1.214 |
| C3–C4       | 1.516         | 1.562          | 1.553       | 1.542         | 1.542 |
| C3–N2       | 1.475         | 1.513          | 1.495       | 1.484         | 1.488 |
| <b>Bond</b> | <b>M06-2X</b> | <b>MPW1PW9</b> | <b>OLYP</b> | <b>PBEPBE</b> |       |
| Zn1–N1      | 2.133         | 2.111          | 2.157       | 2.126         |       |
| Zn1–N2      | 2.134         | 2.111          | 2.157       | 2.126         |       |
| Zn1–O1      | 1.924         | 1.911          | 1.942       | 1.933         |       |
| Zn1–O3      | 1.923         | 1.911          | 1.943       | 1.933         |       |
| C2–O1       | 1.295         | 1.295          | 1.308       | 1.312         |       |
| C2–O2       | 1.208         | 1.210          | 1.222       | 1.224         |       |
| C1–N1       | 1.488         | 1.483          | 1.495       | 1.497         |       |
| C4–O3       | 1.295         | 1.295          | 1.308       | 1.312         |       |
| C4–O4       | 1.208         | 1.210          | 1.222       | 1.224         |       |
| C3–C4       | 1.550         | 1.544          | 1.558       | 1.555         |       |
| C3–N2       | 1.488         | 1.483          | 1.495       | 1.497         |       |

**SI Table 2.** Calculated bond lengths of single Zn-Met<sub>2</sub>

| <b>Bond</b> | <b>Bond Length(Å)</b> |                           |              |            |              |
|-------------|-----------------------|---------------------------|--------------|------------|--------------|
|             | <b>Experiment</b>     | <b>/6-311++G(d,p)</b>     |              |            |              |
|             |                       | <b>B3LYP/<br/>LANL2DZ</b> | <b>B3LYP</b> | <b>M06</b> | <b>M06-L</b> |
| Zn-O21      | 2.059                 | 1.939                     | 1.922        | 1.908      | 1.921        |
| Zn-O22      | 2.049                 | 1.939                     | 1.922        | 1.908      | 1.921        |
| Zn-N1       | 2.052                 | 2.145                     | 2.118        | 2.089      | 2.114        |

|             |               |                |             |               |       |
|-------------|---------------|----------------|-------------|---------------|-------|
| Zn-N2       | 2.064         | 2.145          | 2.119       | 2.089         | 2.114 |
| C11-O11     | 1.25          | 1.25           | 1.21        | 1.21          | 1.21  |
| C11-O21     | 1.25          | 1.33           | 1.30        | 1.29          | 1.30  |
| C11-C21     | 1.57          | 1.58           | 1.57        | 1.56          | 1.56  |
| C21-N1      | 1.48          | 1.52           | 1.50        | 1.49          | 1.50  |
| C21-C31     | 1.53          | 1.54           | 1.53        | 1.52          | 1.52  |
| C31-C41     | 1.53          | 1.54           | 1.53        | 1.52          | 1.52  |
| C41-S1      | 1.79          | 1.90           | 1.84        | 1.82          | 1.82  |
| S1-C(M1)    | 1.76          | 1.89           | 1.82        | 1.81          | 1.80  |
| C12-O12     | 1.24          | 1.25           | 1.21        | 1.21          | 1.21  |
| C12-O22     | 1.28          | 1.33           | 1.30        | 1.29          | 1.30  |
| C12-C22     | 1.53          | 1.58           | 1.57        | 1.56          | 1.56  |
| C22-N2      | 1.48          | 1.52           | 1.50        | 1.49          | 1.50  |
| C22-C32     | 1.55          | 1.54           | 1.53        | 1.52          | 1.52  |
| C32-C42     | 1.51          | 1.54           | 1.53        | 1.52          | 1.52  |
| C42-S2      | 1.81          | 1.90           | 1.84        | 1.82          | 1.82  |
| S2-C(M2)    | 1.79          | 1.89           | 1.82        | 1.81          | 1.80  |
| <b>Bond</b> | <b>M06-2X</b> | <b>MPW1PW9</b> | <b>OLYP</b> | <b>PBEPBE</b> |       |
| Zn-O21      | 1.924         | 1.911          | 1.941       | 1.933         |       |
| Zn-O22      | 1.924         | 1.911          | 1.941       | 1.933         |       |
| Zn-N1       | 2.121         | 2.096          | 2.137       | 2.109         |       |
| Zn-N2       | 2.121         | 2.096          | 2.137       | 2.109         |       |
| C11-O11     | 1.21          | 1.21           | 1.22        | 1.22          |       |
| C11-O21     | 1.29          | 1.29           | 1.31        | 1.31          |       |

|          |      |      |      |      |
|----------|------|------|------|------|
| C11-C21  | 1.56 | 1.56 | 1.58 | 1.57 |
| C21-N1   | 1.49 | 1.49 | 1.50 | 1.50 |
| C21-C31  | 1.52 | 1.52 | 1.54 | 1.53 |
| C31-C41  | 1.52 | 1.52 | 1.53 | 1.53 |
| C41-S1   | 1.82 | 1.82 | 1.84 | 1.83 |
| S1-C(M1) | 1.81 | 1.81 | 1.82 | 1.82 |
| C12-O12  | 1.21 | 1.21 | 1.22 | 1.22 |
| C12-O22  | 1.29 | 1.29 | 1.31 | 1.31 |
| C12-C22  | 1.56 | 1.56 | 1.58 | 1.57 |
| C22-N2   | 1.49 | 1.49 | 1.50 | 1.50 |
| C22-C32  | 1.52 | 1.52 | 1.54 | 1.53 |
| C32-C42  | 1.52 | 1.52 | 1.53 | 1.53 |
| C42-S2   | 1.82 | 1.82 | 1.84 | 1.83 |
| S2-C(M2) | 1.81 | 1.81 | 1.82 | 1.82 |

**SI Table 3.** Calculated bond lengths of double Zn-Gly<sub>2</sub>

| <b>Bond Length(Å)</b> |                   |                           |              |            |              |
|-----------------------|-------------------|---------------------------|--------------|------------|--------------|
| <b>/6-311++G(d,p)</b> |                   |                           |              |            |              |
| <b>Bond</b>           | <b>Experiment</b> | <b>B3LYP/<br/>LANL2DZ</b> | <b>B3LYP</b> | <b>M06</b> | <b>M06-L</b> |
| Zn1-O6                | 2.011             | 2.107                     | 2.111        | 2.081      | 2.101        |
| Zn1-N1                | 2.023             | 2.178                     | 2.186        | 2.123      | 2.145        |
| Zn1-N2                | 2.035             | 2.187                     | 2.196        | 2.127      | 2.148        |
| Zn1-O1                | 2.114             | 2.053                     | 1.979        | 1.947      | 2.125        |

|             |               |                |             |               |       |
|-------------|---------------|----------------|-------------|---------------|-------|
| Zn1-O3      | 2.174         | 1.986          | 2.009       | 2.118         | 1.957 |
| Zn2-N4      | 1.973         | 2.093          | 2.119       | 2.122         | 2.147 |
| Zn2-N3      | 2.070         | 2.18           | 2.106       | 2.126         | 2.142 |
| Zn2-O7      | 2.130         | 1.929          | 1.913       | 1.946         | 1.954 |
| Zn2-O5      | 2.160         | 2.003          | 1.959       | 2.111         | 2.116 |
| C7-N4       | 1.474         | 1.511          | 1.5         | 1.477         | 1.482 |
| C2-O1       | 1.271         | 1.308          | 1.295       | 1.288         | 1.265 |
| C2-O2       | 1.242         | 1.273          | 1.219       | 1.211         | 1.256 |
| C1-N1       | 1.476         | 1.493          | 1.486       | 1.478         | 1.468 |
| C4-O3       | 1.252         | 1.326          | 1.294       | 1.288         | 1.295 |
| C4-O4       | 1.265         | 1.253          | 1.225       | 1.211         | 1.217 |
| C3-C4       | 1.516         | 1.561          | 1.549       | 1.541         | 1.542 |
| C3-N2       | 1.475         | 1.502          | 1.482       | 1.477         | 1.482 |
| C6-O5       | 1.238         | 1.302          | 1.276       | 1.257         | 1.265 |
| C6-O6       | 1.271         | 1.276          | 1.243       | 1.252         | 1.256 |
| C5-C6       | 1.512         | 1.543          | 1.539       | 1.528         | 1.528 |
| C5-N3       | 1.463         | 1.502          | 1.492       | 1.464         | 1.468 |
| C8-O7       | 1.264         | 1.342          | 1.304       | 1.288         | 1.295 |
| C8-O8       | 1.243         | 1.247          | 1.212       | 1.211         | 1.217 |
| C7-C8       | 1.515         | 1.561          | 1.553       | 1.541         | 1.542 |
| <b>Bond</b> | <b>M06-2X</b> | <b>MPW1PW9</b> | <b>OLYP</b> | <b>PBEPBE</b> |       |
| Zn1-O6      | 2.075         | 2.088          | 2.208       | 2.128         |       |
| Zn1-N1      | 2.176         | 2.160          | 2.207       | 2.167         |       |
| Zn1-N2      | 2.198         | 2.170          | 2.209       | 2.177         |       |

|        |       |       |       |       |
|--------|-------|-------|-------|-------|
| Zn1-O1 | 1.977 | 1.969 | 1.998 | 1.994 |
| Zn1-O3 | 2.009 | 1.998 | 2.023 | 2.021 |
| Zn2-N4 | 2.121 | 2.097 | 2.142 | 2.111 |
| Zn2-N3 | 2.107 | 2.084 | 2.132 | 2.097 |
| Zn2-O7 | 1.915 | 1.902 | 1.933 | 1.924 |
| Zn2-O5 | 1.959 | 1.947 | 1.977 | 1.970 |
| C7-N4  | 1.491 | 1.487 | 1.499 | 1.501 |
| C2-O1  | 1.289 | 1.288 | 1.301 | 1.305 |
| C2-O2  | 1.213 | 1.215 | 1.227 | 1.229 |
| C1-N1  | 1.480 | 1.475 | 1.487 | 1.489 |
| C4-O3  | 1.287 | 1.288 | 1.301 | 1.305 |
| C4-O4  | 1.221 | 1.221 | 1.231 | 1.235 |
| C3-C4  | 1.544 | 1.540 | 1.557 | 1.553 |
| C3-N2  | 1.477 | 1.471 | 1.483 | 1.484 |
| C6-O5  | 1.268 | 1.270 | 1.286 | 1.287 |
| C6-O6  | 1.239 | 1.238 | 1.246 | 1.253 |
| C5-C6  | 1.534 | 1.529 | 1.546 | 1.539 |
| C5-N3  | 1.485 | 1.481 | 1.492 | 1.494 |
| C8-O7  | 1.297 | 1.297 | 1.311 | 1.314 |
| C8-O8  | 1.206 | 1.208 | 1.220 | 1.222 |
| C7-C8  | 1.550 | 1.544 | 1.558 | 1.555 |

**SI Table 4.** Calculated bond lengths of double Zn-Metz

|                       |
|-----------------------|
| <b>Bond Length(Å)</b> |
|-----------------------|

| <b>/6-311++G(d,p)</b> |                   |                           |              |            |              |
|-----------------------|-------------------|---------------------------|--------------|------------|--------------|
| <b>Bond</b>           | <b>Experiment</b> | <b>B3LYP/<br/>LANL2DZ</b> | <b>B3LYP</b> | <b>M06</b> | <b>M06-L</b> |
| Zn-O21                | 2.059             | 2.075                     | 2.033        | 2.046      | 2.062        |
| Zn-O22                | 2.049             | 1.982                     | 1.984        | 1.950      | 1.964        |
| Zn-O11"               | 2.240             | 2.150                     | 2.145        | 2.130      | 2.141        |
| Zn-N1                 | 2.052             | 2.183                     | 2.180        | 2.154      | 2.176        |
| Zn-N2                 | 2.064             | 2.147                     | 2.143        | 2.104      | 2.120        |
| C11-O11               | 1.25              | 1.27                      | 1.24         | 1.23       | 1.24         |
| C11-O21               | 1.25              | 1.32                      | 1.28         | 1.28       | 1.28         |
| C11-C21               | 1.57              | 1.56                      | 1.56         | 1.54       | 1.54         |
| C21-N1                | 1.48              | 1.51                      | 1.49         | 1.48       | 1.48         |
| C21-C31               | 1.53              | 1.54                      | 1.53         | 1.52       | 1.52         |
| C31-C41               | 1.53              | 1.54                      | 1.53         | 1.52       | 1.52         |
| C41-S1                | 1.79              | 1.90                      | 1.84         | 1.82       | 1.82         |
| S1-C(M1)              | 1.76              | 1.89                      | 1.83         | 1.81       | 1.81         |
| C12-O12               | 1.24              | 1.25                      | 1.22         | 1.21       | 1.22         |
| C12-O22               | 1.28              | 1.33                      | 1.30         | 1.29       | 1.30         |
| C12-C22               | 1.53              | 1.57                      | 1.56         | 1.55       | 1.56         |
| C22-N2                | 1.48              | 1.51                      | 1.49         | 1.48       | 1.49         |
| C22-C32               | 1.55              | 1.54                      | 1.54         | 1.52       | 1.52         |
| C32-C42               | 1.51              | 1.54                      | 1.53         | 1.52       | 1.52         |
| C42-S2                | 1.81              | 1.90                      | 1.84         | 1.82       | 1.82         |
| S2-C(M2)              | 1.79              | 1.89                      | 1.83         | 1.81       | 1.80         |



| <b>Bond</b> | <b>M06-2X</b> | <b>MPW1PW9</b> | <b>OLYP</b> | <b>PBEPBE</b> |
|-------------|---------------|----------------|-------------|---------------|
| Zn-O21      | 2.056         | 2.022          | 2.044       | 2.045         |
| Zn-O22      | 1.967         | 1.967          | 1.996       | 1.989         |
| Zn-O11"     | 2.118         | 2.124          | 2.242       | 2.174         |
| Zn-N1       | 2.187         | 2.162          | 2.201       | 2.164         |
| Zn-N2       | 2.133         | 2.118          | 2.159       | 2.122         |
| C11-O11     | 1.24          | 1.24           | 1.24        | 1.25          |
| C11-O21     | 1.27          | 1.27           | 1.28        | 1.29          |
| C11-C21     | 1.55          | 1.55           | 1.57        | 1.56          |
| C21-N1      | 1.48          | 1.47           | 1.49        | 1.49          |
| C21-C31     | 1.53          | 1.52           | 1.54        | 1.53          |
| C31-C41     | 1.52          | 1.52           | 1.53        | 1.53          |
| C41-S1      | 1.82          | 1.82           | 1.84        | 1.84          |
| S1-C(M1)    | 1.81          | 1.81           | 1.82        | 1.82          |
| C12-O12     | 1.21          | 1.22           | 1.23        | 1.23          |
| C12-O22     | 1.29          | 1.29           | 1.30        | 1.30          |
| C12-C22     | 1.56          | 1.56           | 1.58        | 1.57          |
| C22-N2      | 1.48          | 1.48           | 1.49        | 1.49          |
| C22-C32     | 1.53          | 1.52           | 1.54        | 1.53          |
| C32-C42     | 1.52          | 1.52           | 1.53        | 1.53          |
| C42-S2      | 1.82          | 1.82           | 1.84        | 1.84          |
| S2-C(M2)    | 1.81          | 1.81           | 1.82        | 1.82          |

**SI Table 5.** RMSD between literature values and values calculated by DFT for Zn-Gly<sub>2</sub>. Rank

determined in ascending order of RMSD.

| <b>Zn-Gly<sub>2</sub> RMSD / basis set 6-311++g(d,p)</b> |      |               |                     |             |               |
|----------------------------------------------------------|------|---------------|---------------------|-------------|---------------|
| <b>Method</b>                                            |      | <b>B3LYP</b>  | <b>B3LYP/Lan12d</b> | <b>M06</b>  | <b>M06-L</b>  |
|                                                          |      |               | <b>z</b>            |             |               |
| Mono                                                     | RMSD | 0.109435      | 0.111272            | 0.109905    | 0.109093      |
|                                                          | Rank | 6             | 8                   | 7           | 4             |
| <b>Method</b>                                            |      | <b>M06-2X</b> | <b>MPW1PW91</b>     | <b>OLYP</b> | <b>PBEPBE</b> |
| Mono                                                     | RMSD | 0.108418      | 0.109257            | 0.106706    | 0.104346      |
|                                                          | Rank | 3             | 5                   | 2           | 1             |
| <b>Method</b>                                            |      | <b>B3LYP</b>  | <b>B3LYP/Lan12d</b> | <b>M06</b>  | <b>M06-L</b>  |
|                                                          |      |               | <b>z</b>            |             |               |
| Bi                                                       | RMSD | 0.098368      | 0.094459            | 0.072247    | 0.081803      |
|                                                          | Rank | 7             | 4                   | 1           | 2             |
| <b>Method</b>                                            |      | <b>M06-2X</b> | <b>MPW1PW91</b>     | <b>OLYP</b> | <b>PBEPBE</b> |
| Bi                                                       | RMSD | 0.096145      | 0.095448            | 0.104142    | 0.09297       |
|                                                          | Rank | 6             | 5                   | 8           | 3             |

**SI Table 6.** RMSD between literature values and values calculated by DFT for Zn-Met<sub>2</sub>. Rank determined in ascending order of RMSD.

| <b>Zn-Met<sub>2</sub> RMSD / basis set 6-311++g(d,p)</b> |  |              |                     |            |              |
|----------------------------------------------------------|--|--------------|---------------------|------------|--------------|
| <b>Method</b>                                            |  | <b>B3LYP</b> | <b>B3LYP/Lan12d</b> | <b>M06</b> | <b>M06-L</b> |
|                                                          |  |              | <b>z</b>            |            |              |

|               |      |               |                                 |             |               |
|---------------|------|---------------|---------------------------------|-------------|---------------|
| Mono          | RMSD | 0.054059      | 0.071756                        | 0.05288     | 0.050952      |
|               | Rank | 7             | 8                               | 6           | 2             |
| <b>Method</b> |      | <b>M06-2X</b> | <b>MPW1PW91</b>                 | <b>OLYP</b> | <b>PBEPBE</b> |
| Mono          | RMSD | 0.051541      | 0.051888                        | 0.052277    | 0.050784      |
|               | Rank | 3             | 4                               | 5           | 1             |
| <b>Method</b> |      | <b>B3LYP</b>  | <b>B3LYP/Lan12d</b><br><b>z</b> | <b>M06</b>  | <b>M06-L</b>  |
| Bi            | RMSD | 0.047993      | 0.067048                        | 0.045015    | 0.045081      |
|               | Rank | 6             | 8                               | 2           | 3             |
| <b>Method</b> |      | <b>M06-2X</b> | <b>MPW1PW91</b>                 | <b>OLYP</b> | <b>PBEPBE</b> |
| Bi            | RMSD | 0.050089      | 0.045587                        | 0.047251    | 0.041804      |
|               | Rank | 7             | 4                               | 5           | 1             |

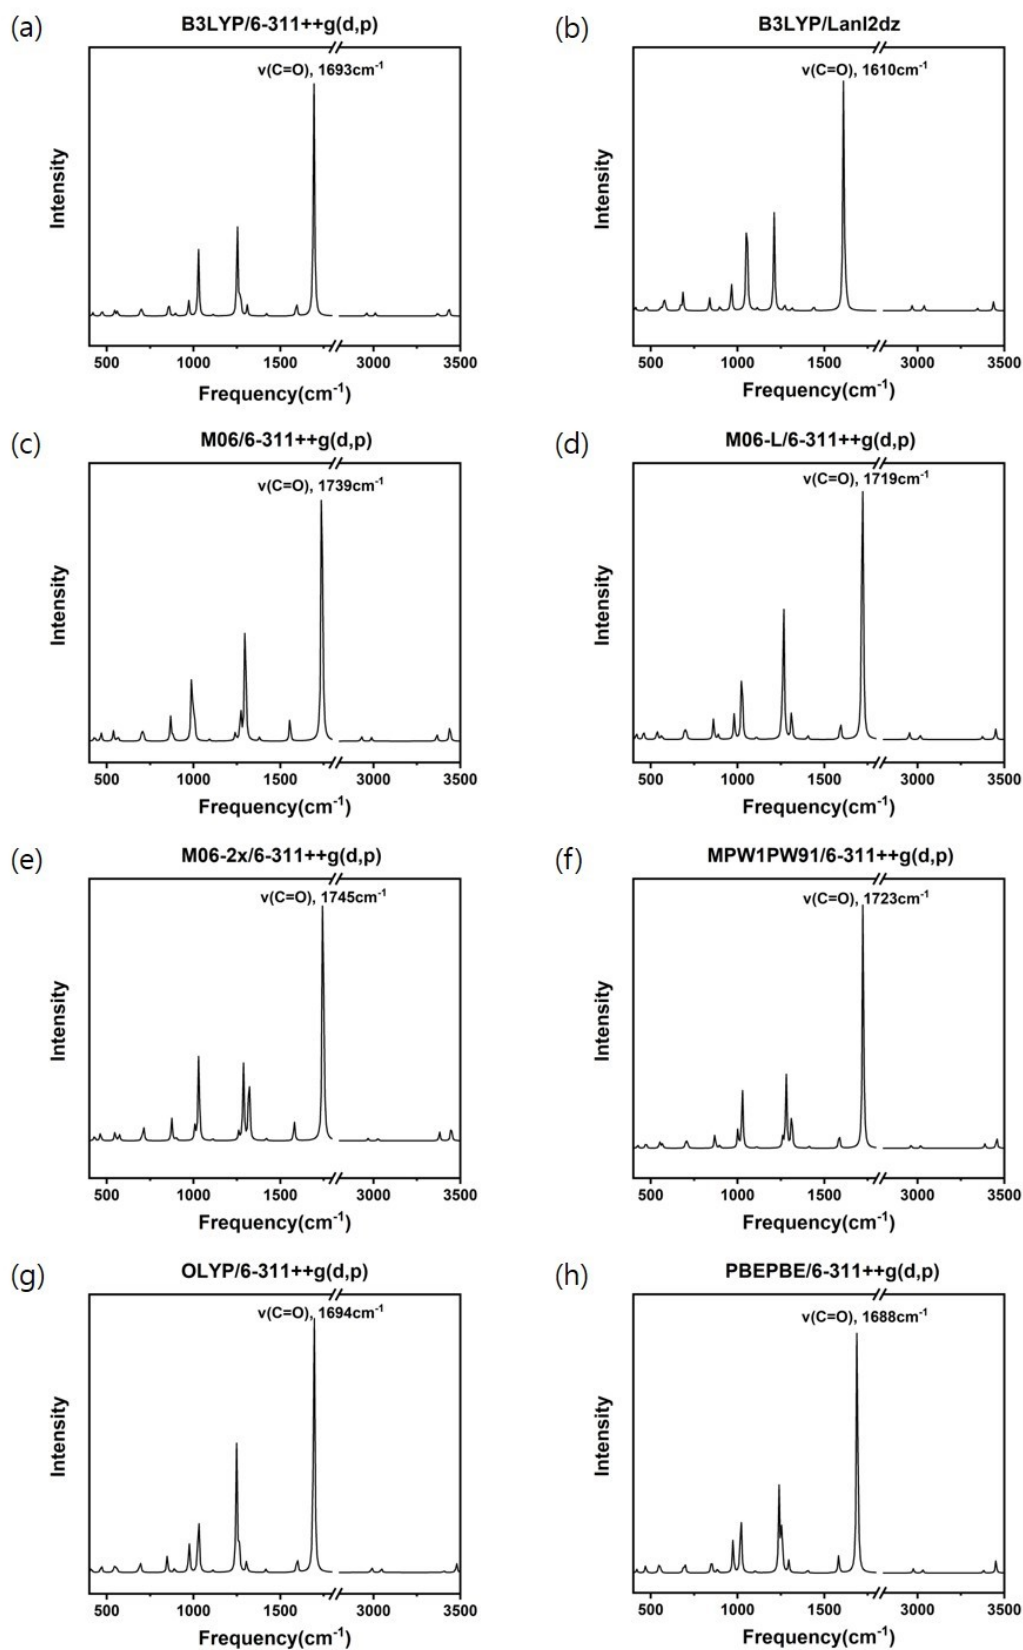

SI Fig. 2. IR spectra of single Zn-Gly<sub>2</sub>

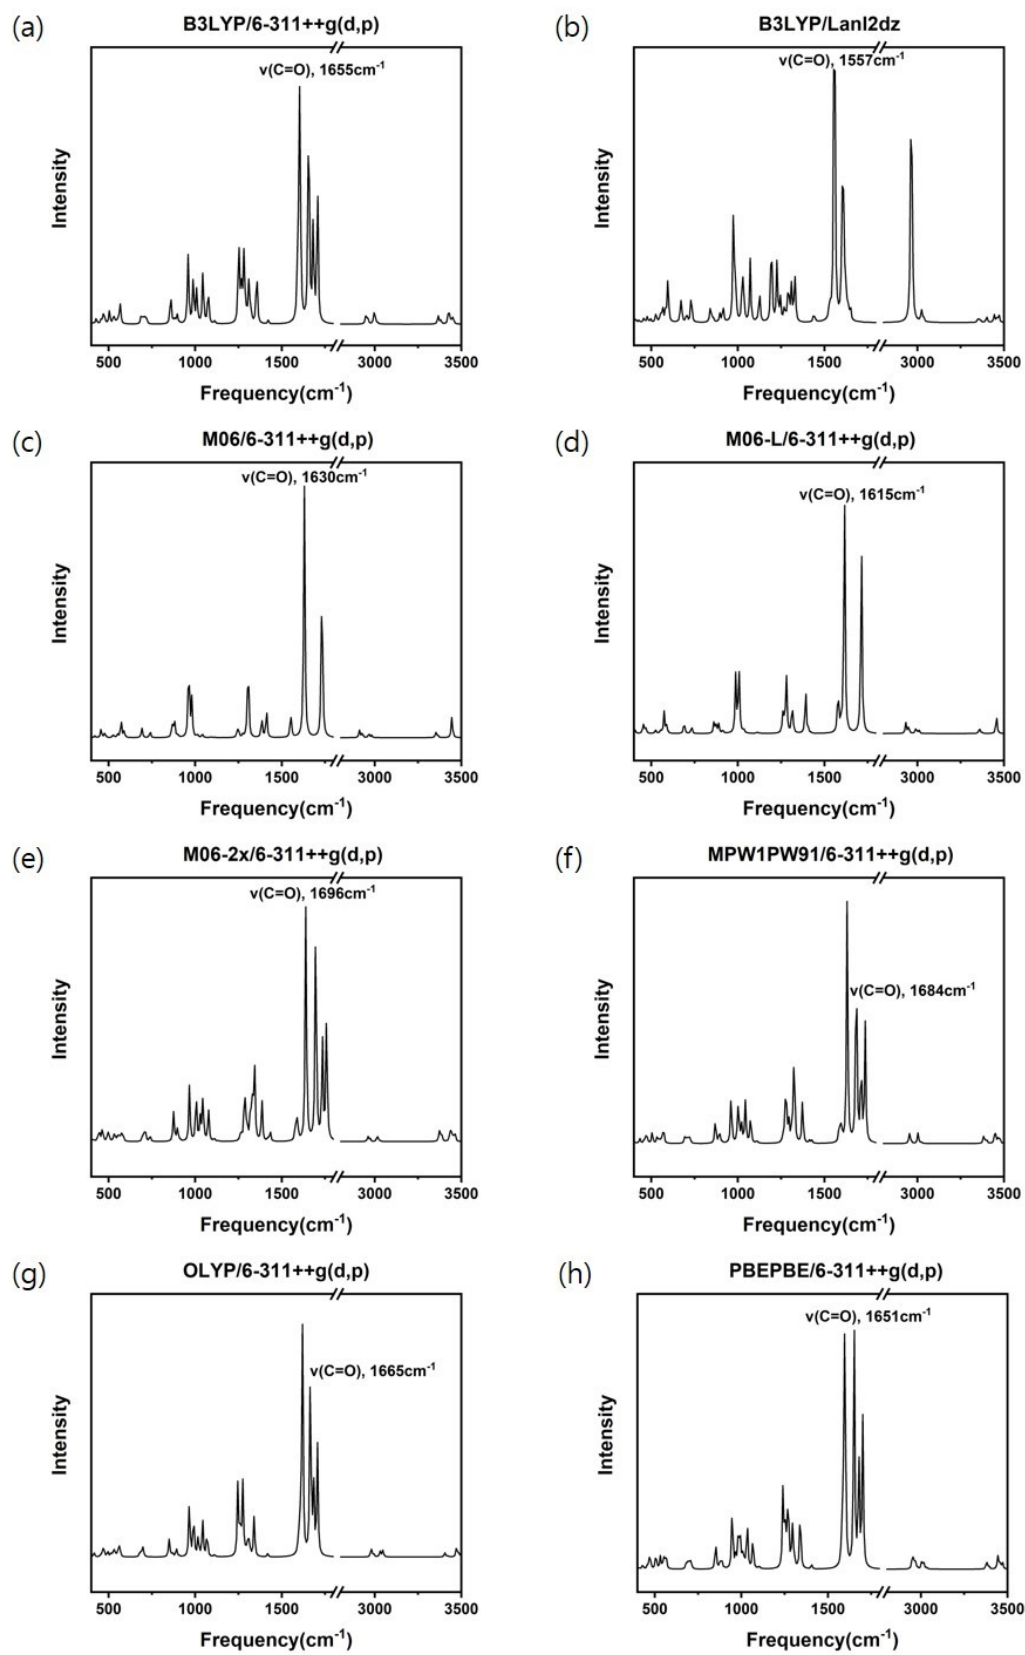

SI Fig. 3. IR spectra of single Zn-Met<sub>2</sub>

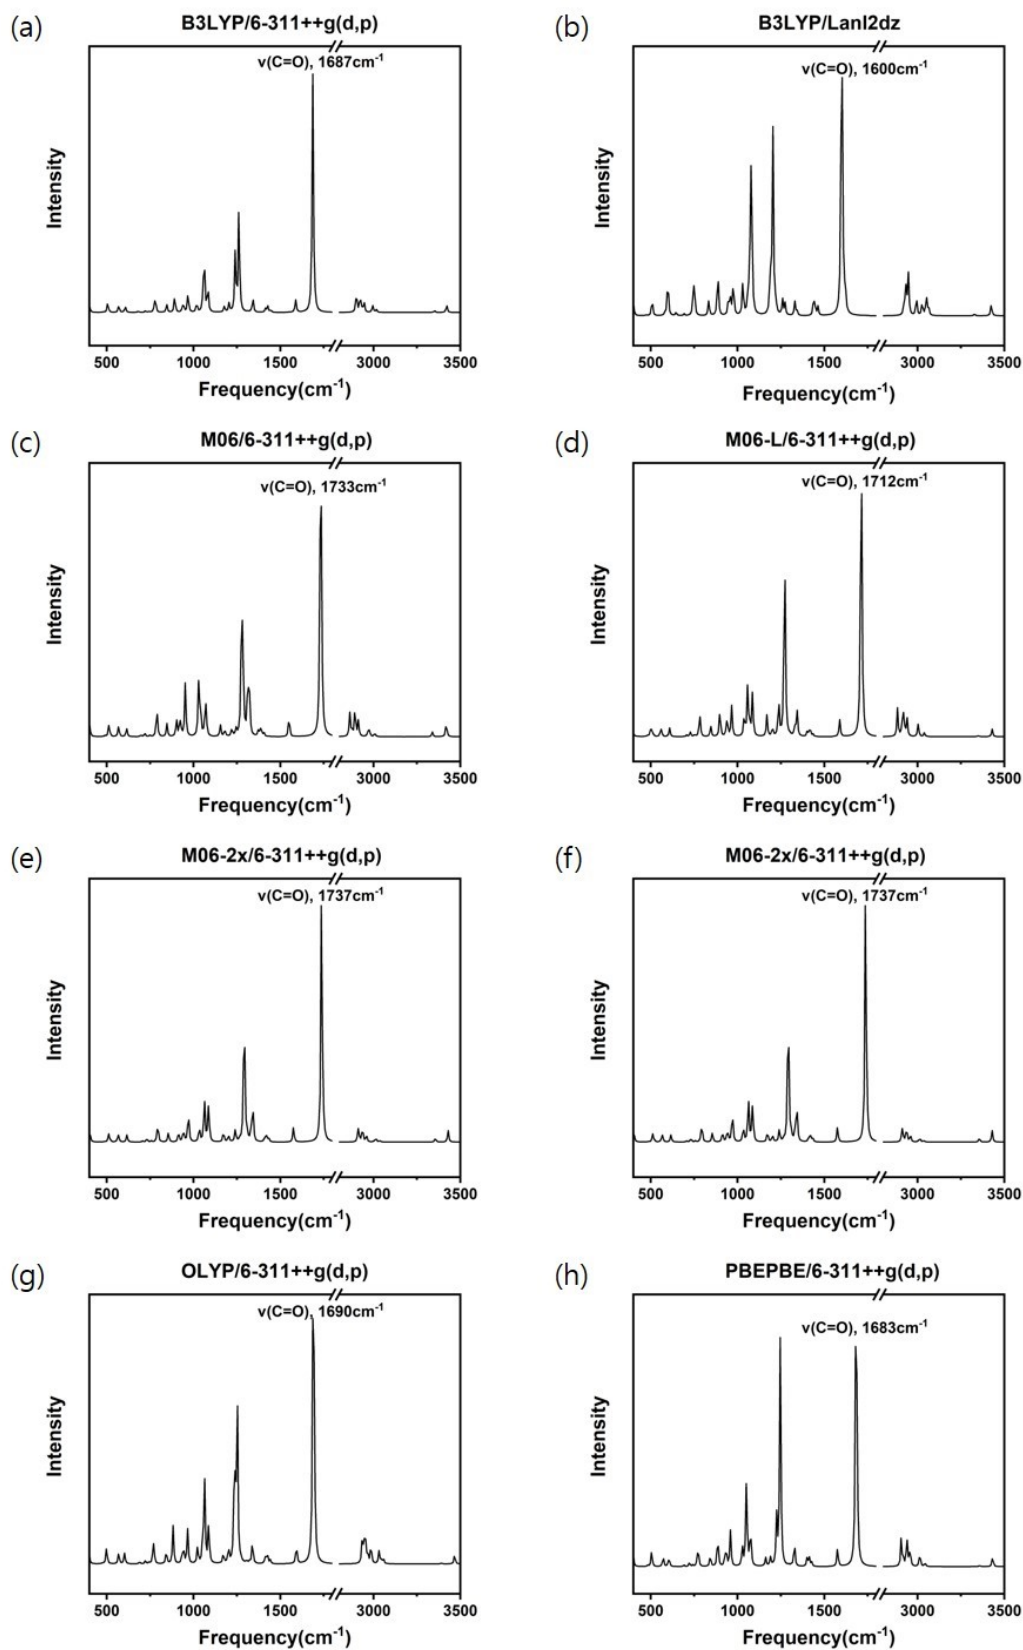

SI Fig. 4. IR spectrum of double Zn-Gly<sub>2</sub>

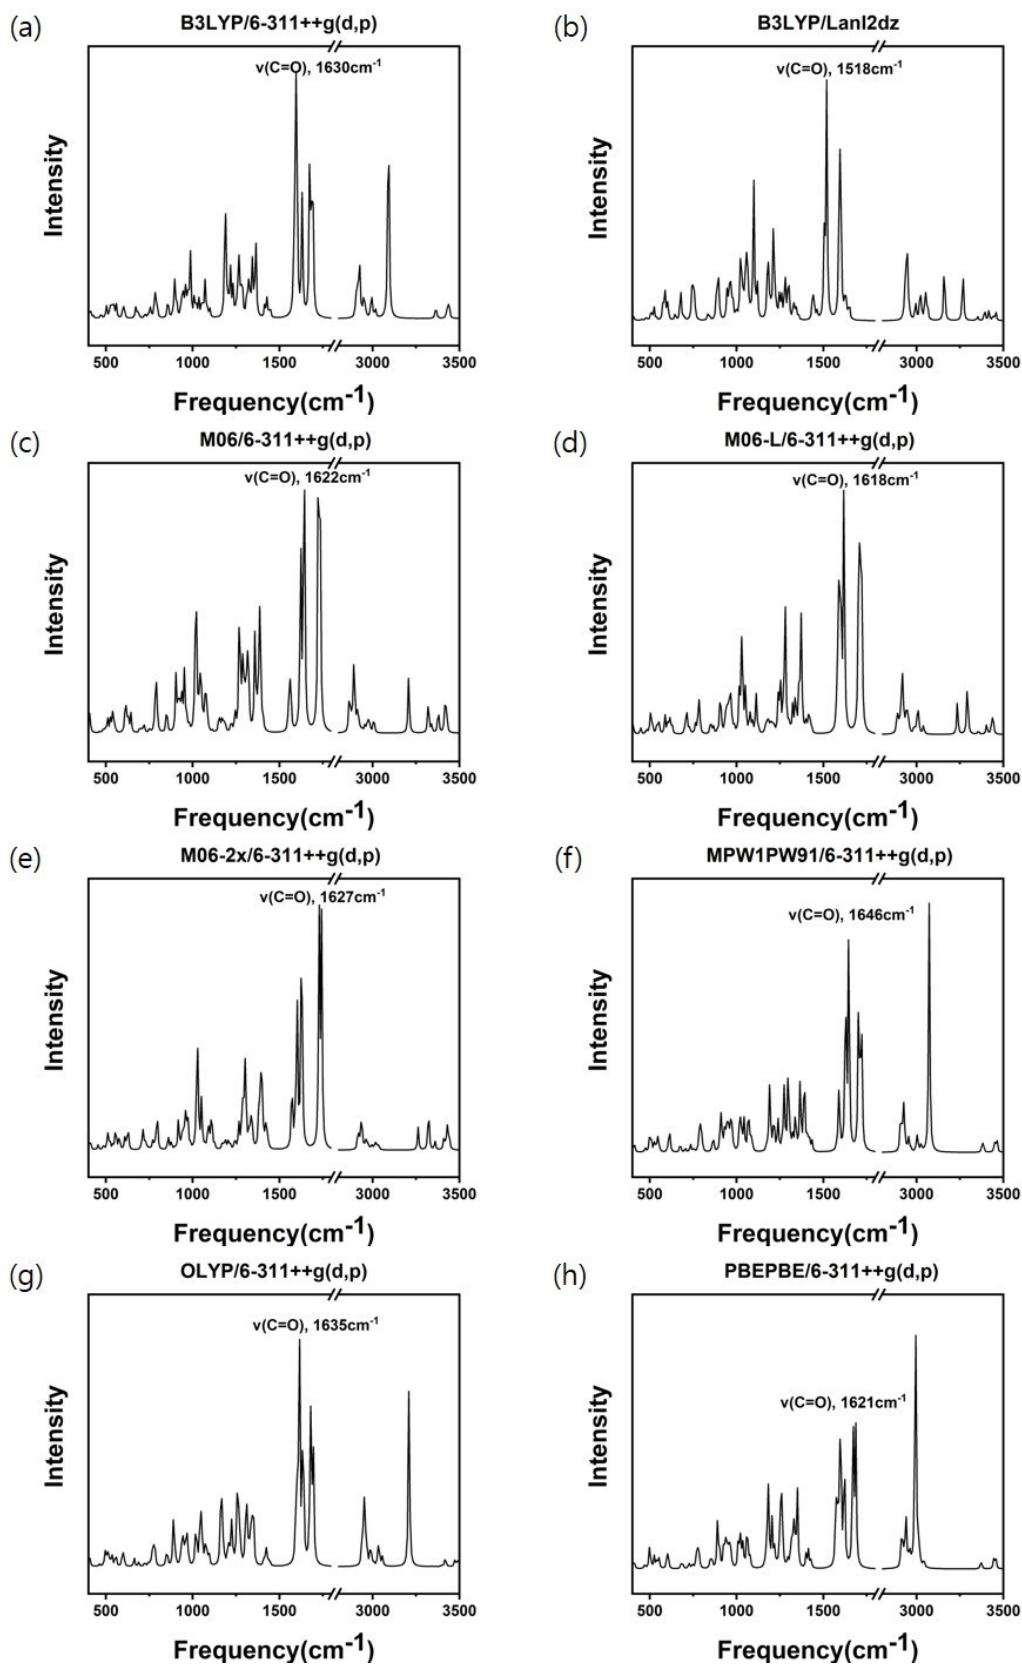

SI Fig. 5. IR spectra of double Zn-Met<sub>2</sub>
